# Supplementary material for: Single-cell biophysical study reveals deformability and internal ordering relationship in T cells
Source: Royal Society of Chemistry journal article supplement (doi:10.1039/d0sm00648c), 2020-01-01
Supplement: d0sm00648c1.xlsx [file d0sm00648c1.xlsx]

## Sheet: TableS2-S3. Analysis workflow
Supplementary Table 2: Plugins and references for quantification of confocal z-stack morphological and intensity measures
Plugins	Source (Image J libraries)		Citation
3D Image Suite	https://imagejdocu.tudor.lu/plugin/stacks/3d_ij_suite/start		Ollion, J., Cochennec, J., Loll, F., Escudé, C., & Boudier, T. (2013). TANGO: a generic tool for high-throughput 3D image analysis for studying nuclear organization. Bioinformatics, 29(14), 1840-1841.
MorphoLibJ	https://imagej.net/MorphoLibJ		Legland, D., Arganda-Carreras, I., & Andrey, P. (2016). MorphoLibJ: integrated library and plugins for mathematical morphology with ImageJ. Bioinformatics, 32(22), 3532-3534.
3D ConvexHull	https://imagej.nih.gov/ij/plugins/3d-convex-hull/index.html		Sheets, K. G., Jun, B., Zhou, Y., Winkler, J., Zhu, M., Petasis, N., ... & Bazan, N. G. (2011). Topical neuroprotectin D1 attenuates experimental CNV and induces activated microglia redistribution. Investigative Ophthalmology & Visual Science, 52(14), 5470-5470.
	Supplementary Table 3: Workflow of the confocal z-stack analysis process
Channels	# Tasks		Image processing tools
DAPI	1	Substract background	Process->Substract background (50 pixels, light background, create background)
	2	Segmentation	Process->Binary->Make binary (Otsu's method, dark, black background)
	3	Geometry measures of the segmented nucleus z-stack	Input: binary z-stack of the nucleus
			i) Plugins->3D->3D Geometrical Measures
			ii) Plugins->3D->3D Shape Measures
			iii) Plugins->3D-> 3D Ellipsoid fitting
			iv) Plugins->3D->3D convex hull
			Input: binary z-stack of the 3DconvexHull nucleus
			v) Analyze->3D ConvexHull->Measure all…
	4	Intensity measures of the nucleus	Input: DAPI channel z-stack
			vi) Plugins->3D->3D Intensity Measurements
			vii) Plugins->MorphoLibJ->Analyze->2D/3D Intensity measurements
DAPI + actin	5	Make composite	Image->Color->Channel tools-> Compoite->MakeRGB
	6	Substract background	Process->Substract background (50 pixels, light background, create background)
	7	Segmentation	Process->Binary->Make binary (Otsu's method, dark, black background)
	8	Geometry measures of the segmented cell z-stack	Input: binary z-stack of the nucleus
			i) Plugins->3D->3D Geometrical Measures
			ii) Plugins->3D->3D Shape Measures
			iii) Plugins->3D-> 3D Ellipsoid fitting
			iv) Plugins->3D->3D convex hull
			Input: binary z-stack of the 3DconvexHull nucleus
			v) Analyze->3D ConvexHull->Measure all…
Actin	9	Intensity measures of the actin content	Input: actin composite z-stack
			vi) Plugins->3D->3D Intensity Measurements
			vii) Plugins->MorphoLibJ->Analyze->2D/3D Intensity measurements
	10	Cortical thickness measurement of actin content	Plugins->Macros->Record; Write in a .txt macro the command for all the cells
			Process->PlotProfile-> Save list in a text file the 4 sets of data (lines across the cell cortex in the middle z plane)
			Fityk -> Gaussian Fits -> FWHM

## Sheet: TableS4. Dataset 42 parameters
Supplementary Table 4: Dataset of biomechanical parameters
#	Category		Parameter Cell #	1	2	3	4	5	6	7	8	9	10	11	12	13	14	15	16	17	18	19	20	21	22	23	24	25	26	27	28	29	30
1	Mechanics	Microaspiration	Mean apparent elastic modulus, E	1.22893	0.649547	0.967693	0.598914	1.22402	0.0856626	0.160254	0.246886	0.254939	0.365103	0.337284	0.206641	1.872	0.238226	0.102134	0.133588	0.195833	0.145153	0.176752	0.142553	0.185044	0.186516	0.177139	0.248178	0.610443	0.499361	0.155289	0.202421	0.788314	0.532367
2			Standard error of E	0.137615	0.0868558	0.0807671	0.0599624	0.0936284	0.0277504	0.0274473	0.0428075	0.0359265	0.0433672	0.03136	0.0353604	0.299	0.0227342	0.0180808	0.0240838	0.0300336	0.0364304	0.0221214	0.022378	0.0375421	0.0238604	0.0252388	0.0322493	0.0813225	0.0643902	0.0284549	0.0398474	0.093489	0.0599373
3			Mean apparent viscosity, m	2.45844	1.01449	1.739	1.07562	14.154	0.640853		1.25246	0.294811	0.50551	0.638284			0.301489	0.263025	0.219205	0.53403	0.322213	0.696736	0.338579	0.768226	0.753055	0.351745	0.828718	2.83934	3.61555	0.316107	0.627977	7.45429	4.83083
4			Standard error of m	0.535314	4.61367	0.777705	4.81031	3.16492	0.118496		0.220467	0.0800176	0.14236	0.170256			89.488	0.0537932	0.0532146	0.125948	0.0656506	0.157471	0.0631871	0.190425	0.238137	0.105038	0.237043	0.891324	0.979979	0.0745723	0.146183	2.22912	1.22483
5	Morphological descriptors	Cell geometry	Cell surface area	279.58	360.65	248.77	270.25	255.6	231.98	257.17	278.432	254.27	262.699	361.04	166.29	383.73	180.08	313.84	300.37	205.85	253.19	314.97	355.84	314.58	277.8	188.48	247.95	298.12	180.7	298.15	157.63	196.73	144.65
6			Cell volume	153.86	197.17	164.39	186.79	180.34	161.19	200.09	191.451	179.78	176.321	239.83	96.65	269.71	107.77	212.36	224.24	124.99	183.71	240.11	259.7	222.76	203	122.34	145.83	210.14	88.05	285.69	114.4	142.7	172.02
7			Cell sphericity	0.5	0.45	0.58	0.58	0.6	0.62	0.64	0.6	0.606	0.579	0.52	0.61	0.53	0.61	0.55	0.59	0.59	0.58	0.59	0.55	0.56	0.6	0.63	0.5	0.57	0.54	0.57	0.64	0.57	0.63
8			Cell equivalent radius	3.32414	3.61064	3.3983	3.54613	3.50484	3.37611	3.62838	3.57539	3.50121	3.47861	3.85424	2.84689	4.00808	2.95214	3.70108	3.76884	3.10167	3.52653	3.85574	3.95787	3.76053	3.64588	3.07959	3.26527	3.68813	2.75982	4.08572	3.01147	3.24174	3.45009
9			Cell compactness	0.12	0.09	0.2	0.2	0.22	0.24	0.27	0.22	0.222	0.194	0.14	0.23	0.15	0.22	0.16	0.21	0.2	0.19	0.21	0.17	0.18	0.22	0.25	0.12	0.19	0.15	0.18	0.26	0.19	0.25
10			Cell elongation	0.601971	0.760476	0.684853	0.796828	0.683188	0.730644	0.963173	0.720195	0.628094	0.622001	0.665219	0.812167	0.56738	0.822365	0.775349	0.841361	0.931229	0.623546	0.650428	0.653959	0.623619	0.816024	0.937687	0.665073	0.770633	0.646704	0.822098	0.857098	0.745546	0.851667
11			Cell flatness	0.858491	0.852028	0.956606	0.729962	0.981144	0.871701	0.884492	0.858446	0.846731	0.797115	0.840588	0.831205	0.846971	0.841641	0.736883	0.685262	0.796005	0.914778	0.899085	0.665499	0.980147	0.651007	0.909585	0.934939	0.759766	0.8118	0.925104	0.970924	0.943295	0.844493
12			Cell spareness	0.964	0.92	0.954	0.947	0.979	0.791	0.994	0.955	0.974	0.955	0.912	0.927	0.966	0.98	0.949	0.95	0.968	0.931	0.969	0.954	0.964	0.95	0.982	0.953	0.955	0.905	0.967	0.992	0.964	0.967
13			Cell x-axis	5.987	4.701	4.509	4.666	4.58	3.371	3.883	4.11	5.09	5.127	5.526	3.567	6.634	3.586	4.941	4.879	3.548	5.589	5.378	6.112	5.25	4.93	3.338	4.183	4.883	4.141	4.109	3.17	3.761	3.209
14			Cell y-axis	3.604	3.575	3.088	3.718	3.129	2.463	3.74	2.96	3.197	3.189	3.676	2.897	3.764	2.949	3.831	4.105	3.304	3.485	3.498	3.997	3.274	4.023	3.13	2.782	3.763	2.678	3.378	2.717	2.804	2.733
15			Cell z-axis	3.094	3.046	2.954	2.714	3.07	2.147	3.308	2.541	2.707	2.542	3.09	2.408	3.188	2.482	2.823	2.813	2.63	3.188	3.145	2.66	3.209	2.619	2.847	2.601	2.859	2.174	3.125	2.638	2.645	2.308
16			Cell solidity	0.78	0.789	0.65	0.66	0.654	0.72	0.668	0.699	0.636	0.673	0.923	0.655	0.738	0.619	0.674	0.669	0.639	0.674	0.663	0.664	0.648	0.661	0.65	0.638	0.668	0.653	0.673	0.608	0.634	0.638
17			Cell convexity	1.077	1.099	0.902	0.898	0.878	0.902	0.845	0.923	0.883	0.907	1.256	0.874	0.966	0.82	0.947	0.922	0.85	0.914	0.923	0.934	0.9	0.9	0.883	0.881	0.931	0.744	0.915	0.817	0.872	0.84
18		Nucleus geometry	Nucleus surface area	283.14	307.09	248.407	268.25	263.33	200.032	214.519	245.595	242.541	252.915	315.25	154.19	250.81	161.69	247.37	244.28	181.75	235.9	281.08	296.44	271.68	268.39	161.58	216.02	301.85	160.67	285.95	159.33	221.6	232
19			Nucleus volume	148.95	185.53	157.797	177.65	172.87	94.411	153.702	168.607	158.809	158.821	213.95	82.61	168.24	93.69	142.23	152.04	106.6	137.73	192.79	183.16	182.49	168.76	99.06	130.88	199.74	82.08	219.82	95.52	136.11	163.32
20			Nucleus sphericity	0.48	0.51	0.568	0.57	0.57	0.501	0.647	0.601	0.585	0.561	0.55	0.59	0.59	0.62	0.53	0.56	0.6	0.55	0.57	0.53	0.57	0.55	0.64	0.58	0.55	0.57	0.62	0.63	0.58	0.62
21			Nucleus equivalent radius	3.28839	3.53814	3.35225	3.48732	3.45576	2.82474	3.323	3.42712	3.3594	3.35949	3.71029	2.70177	3.42463	2.81753	3.23818	3.31098	2.94141	3.20366	3.5837	3.52301	3.51871	3.42815	2.87036	3.14964	3.62626	2.69598	3.74392	2.83575	3.19105	3.39092
22			Nucleus compactness	0.11	0.13	0.184	0.185	0.19	0.126	0.271	0.217	0.2	0.176	0.17	0.21	0.2	0.23	0.15	0.18	0.21	0.16	0.19	0.15	0.19	0.17	0.26	0.19	0.16	0.18	0.23	0.26	0.19	0.24
23			Nucleus elongation	0.744297	0.738687	0.63976	0.757764	0.626585	0.819009	0.865482	0.638053	0.609795	0.637615	0.500242	0.8571	0.74762	0.718078	0.793481	0.629086	0.937283	0.67927	0.616805	0.612831	0.589729	0.770674	0.845516	0.631436	0.671458	0.542582	0.669871	0.829028	0.619058	0.766966
24			Nucleus flatness	0.814281	0.846132	0.953691	0.70847	0.946475	0.758091	0.927039	0.842672	0.827946	0.776666	0.906361	0.785141	0.752147	0.846538	0.640405	0.94344	0.73358	0.833657	0.841478	0.641366	0.962252	0.623762	0.876094	0.925608	0.755211	0.85654	0.901903	0.971439	0.905759	0.766481
25			Nucleus spareness	0.94	0.96	0.96	0.93	0.97	0.85	0.99	0.97	0.97	0.95	0.95	0.91	0.98	0.95	0.94	0.98	0.95	0.91	0.96	0.94	0.97	0.95	0.98	0.97	0.95	0.96	0.98	0.99	0.96	0.98
26			Nucleus x-axis	4.384	4.707	4.658	4.83	4.89	3.735	3.769	4.951	5.023	5.014	6.191	3.345	4.517	4.746	4.479	4.834	3.46	4.549	5.308	5.783	5.121	4.849	3.379	4.428	5.287	4.368	5.098	3.252	4.628	4.45
27			Nucleus y-axis	3.263	3.477	2.98	3.66	3.064	3.059	3.262	3.159	3.063	3.197	3.097	2.867	3.377	3.408	3.554	3.041	3.243	3.09	3.274	3.544	3.02	3.737	2.857	2.796	3.55	2.37	3.415	2.696	2.865	3.413
28			Nucleus z-axis	2.657	2.942	2.842	2.593	2.9	2.319	3.024	2.662	2.536	2.483	2.807	2.251	2.54	2.885	2.276	2.869	2.379	2.576	2.755	2.273	2.906	2.331	2.503	2.588	2.681	2.03	3.08	2.619	2.595	2.616
29			Nucleus solidity	0.848	0.86	0.78	0.741	0.803	0.666	0.66	0.701	0.629	0.676	0.935	0.65	0.624	0.868	0.635	0.767	0.648	0.622	0.643	0.657	0.63	0.664	0.62	0.626	0.661	0.624	0.653	0.604	0.645	0.652
30			Nucleus convexity	0.987	1.212	1.135	0.991	1.048	0.846	0.827	0.908	0.876	0.909	1.227	0.864	0.863	1.193	0.909	1.011	0.877	0.871	0.891	0.935	0.888	0.901	0.827	0.865	0.923	0.748	0.867	0.806	0.891	0.844
31		Nucleus/Cell ratio	Ratio betweeen nuclear and cell volume	0.989247	0.979921	0.986449	0.983416	0.985998	0.836684	0.915837	0.958531	0.959499	0.965757	0.962653	0.949023	0.854432	0.954403	0.874929	0.878513	0.948333	0.908445	0.929447	0.890129	0.935694	0.940281	0.932059	0.964589	0.983223	0.976868	0.916342	0.94165	0.984363	0.982849
32	Biomolecular-based descriptors	Actin intensity	Mean actin cortical thickness	0.0755221	0.240927	0.162065	0.100807	0.0839625	0.230058	0.317423	0.128994	0.247399	0.234663	0.131987	0.0975649	0.441529	0.110916	0.354984	0.232891	0.148477	0.228824	0.229893	0.175416	0.185053	0.109428	0.200592	0.132344	0.146807	0.126675	0.272141	0.10025	0.209361	0.158287
33			Actin mean intensity	42.703	15.333	24.264	30.491	25.816	1.169	1.863	0.679	19.559	17.6	26.329	34.721	22.482	46.866	57.297	37.111	70.935	9.818	18.711	19.127	20.686	23.453	71.17	6.727	22.861	4.305	44.021	32.532	15.727	72.869
34			Actin texture	95.214	16.592	20.227	29.289	22.043	2.599	3.605	1.954	17.835	16.735	19.636	23.416	19.847	26.92	31.739	26.542	39.219	12.123	16.366	16.766	17.037	18.079	38.298	8.69	18.185	7.312	26.928	21.841	14.178	42.072
35			Actin integrated density	7922.64	3024.05	3988.78	5417.09	4655.71	69.0259	372.77	83.9427	3516.32	2927.25	6315.8	3355.82	7242.89	5050.84	12167.9	8321.66	8866.45	16573.3	4492.77	4967.36	4608.05	4849.92	8707.15	812.81	4804.06	393.404	7733.96	3070.96	1772.72	5976.57
36			Actin skewness	1.781	1.675	1.215	1.309	1.278	3.241	2.976	4.124	1.298	1.35	1.096	0.915	1.366	0.798	0.746	1.049	1.033	2.05	1.303	1.358	1.213	1.098	0.922	1.806	1.206	2.52	0.925	0.957	1.329	1.25
37			Actin kurtosis	1.173	4.102	2.008	2.13	2.225	14.773	12.607	23.404	2.179	2.369	1.632	1.034	2.617	0.821	0.643	1.45	1.524	6.222	2.288	2.675	2.023	1.53	1.031	4.134	2.06	8.823	1.139	1.174	2.389	2.017
38		DAPI intensity	DAPI mean intensity	8.487	23.541	67.239	60.757	49.48	95.049	52.779	67.793	122.186	86.104	11.776	67.087	12.36	255	102.093	73.127	44.86	18.807	67.019	70.887	71.638	59.374	126.709	55.776	47.607	0.409	72.147	105.359	52.161	107.802
39			DAPI texture	16.363	27.185	48.286	64.423	42.553	40.114	31.675	44.193	53.071	43.511	9.318	30.443	30.277	29.331	46.174	44.579	25.809	11.604	41.888	38.048	43.072	37.238	56.808	30.581	29.773	2.591	41.754	46.956	30.918	70.84
40			DAPI integrated density	1574.58	4543.74	10610.9	10794.2	8776.96	8974.15	8112.24	11430.4	19404.2	13675.4	2521.22	5541.92	1956.17	86.947	14521.3	13646.3	4781.9	2590.29	12921.1	12983.4	13073.3	10020.4	12551.5	7299.85	9509.02	35.237	15859.1	10064.3	7099.84	17606.4
41			DAPI skewness	2.362	1.218	0.885	1.025	0.984	0.641	0.946	0.893	0.477	0.657	0.912	0.622	3.704	46.599	0.616	0.613	0.738	0.725	0.938	0.671	0.859	0.858	0.408	0.639	0.838	7.075	0.828	0.854	0.697	0.552
42			DAPI kurtosis	6.705	1.697	0.785	0.245	1.045	0.456	1.472	0.625	-0.29	0.315	0.888	0.689	15.965	1.81	0.277	0.218	0.328	0.588	1.094	0.564	0.864	0.962	-0.471	0.459	0.822	57.804	0.892	0.714	0.461	-0.729

## Sheet: Table S5-S6. Correlations
Supplementary Table 5: Dataset of Spearman's correlation coefficients
#	Correlation matrix	1	2	3	4	5	6	7	8	9	10	11	12	13	14	15	16	17	18	19	20	21	22	23	24	25	26	27	28	29	30	31	32	33	34	35	36	37	38	39	40	41	42
1	Mean apparent elastic modulus, E	1	0.679693	0.736561	0.784864	-0.229391	-0.396262	-0.181646	-0.396262	-0.147	-0.134876	0.149327	0.000891068	-0.0883302	-0.303927	-0.130841	-0.224288	-0.153589	0.169763	0.102347	-0.080653	0.101914	-0.0916197	-0.242546	0.202715	-0.0564842	0.0832128	-0.0910001	0.229391	0.412105	0.384376	0.993988	-0.52843	0.0160196	0.101902	-0.260541	0.110357	0.0140171	-0.295695	-0.058516	-0.214039	0.294137	0.131049
2	Standard error of E	0.679693	1	0.452612	0.459517	-0.0618947	-0.204163	-0.296363	-0.204163	-0.259375	-0.381292	0.302194	-0.0347749	0.0630079	-0.249137	0.0920731	0.0416574	0.0100234	0.134699	0.0890571	-0.0523142	0.0881764	-0.0834173	-0.12937	0.148074	0.107639	-0.0852722	-0.162307	0.157631	0.0999778	0.0654788	0.680927	-0.231377	-0.166982	-0.0202605	-0.216186	0.376044	0.278749	-0.481576	-0.123789	-0.320606	0.369364	0.24513
3	Mean apparent viscosity, m	0.736561	0.452612	1	0.948786	-0.265079	-0.351436	-0.103514	-0.351436	-0.101752	-0.0785929	0.197462	0.0120334	-0.196083	-0.415535	-0.269115	-0.30108	-0.227566	0.0994881	0.0371689	-0.092078	0.0360601	-0.106944	-0.276016	0.159154	-0.0839667	0.12041	-0.00912531	0.239261	0.362159	0.322164	0.747522	-0.564782	-0.0398398	-0.0140218	-0.240151	0.148898	0.099043	-0.153795	-0.0856889	-0.252615	0.406187	0.221456
4	Standard error of m	0.784864	0.459517	0.948786	1	-0.200979	-0.311373	-0.145232	-0.311373	-0.140801	-0.024936	0.119101	-0.0338719	-0.166704	-0.318495	-0.2266	-0.287496	-0.203295	0.173826	0.12219	-0.0994531	0.121313	-0.114981	-0.234168	0.127991	-0.0868932	0.154685	0.0896951	0.280659	0.41291	0.40521	0.785165	-0.529386	-0.000222568	0.0389495	-0.211217	0.0883597	0.0514133	-0.160917	-0.0523036	-0.237926	0.449366	0.204986
5	Cell surface area	-0.229391	-0.0618947	-0.265079	-0.200979	1	0.888765	-0.600961	0.888765	-0.568754	-0.401691	-0.212061	-0.207373	0.783315	0.774416	0.618756	0.689371	0.86312	0.844716	0.762403	-0.494587	0.76182	-0.460614	-0.357326	-0.160863	-0.0416272	0.659622	0.509677	0.287653	0.274113	0.486258	-0.258488	0.394081	-0.155506	-0.106118	0.228921	0.118576	0.120356	-0.303226	-0.12881	0.128365	0.266296	0.283648
6	Cell volume	-0.396262	-0.204163	-0.351436	-0.311373	0.888765	1	-0.337385	1	-0.310473	-0.202515	-0.176012	-0.070832	0.63782	0.753504	0.607854	0.55537	0.703539	0.767742	0.827364	-0.289738	0.827678	-0.242358	-0.295917	-0.153076	0.118806	0.698776	0.568854	0.337931	0.154633	0.30622	-0.407659	0.496217	-0.0896552	-0.0860957	0.279199	0.0300334	0.111902	-0.107453	0.076307	0.367742	0.0860957	0.132369
7	Cell sphericity	-0.181646	-0.296363	-0.103514	-0.145232	-0.600961	-0.337385	1	-0.337385	0.992511	0.594469	0.111632	0.468855	-0.632848	-0.326459	-0.297057	-0.424476	-0.595316	-0.584459	-0.341845	0.558219	-0.339653	0.602617	0.471009	0.0878682	0.234561	-0.32356	-0.164121	-0.0136024	-0.102587	-0.379769	-0.179982	-0.113862	0.179062	0.0961091	-0.137585	-0.226336	-0.148289	0.583344	0.477201	0.272272	-0.288773	-0.311518
8	Cell equivalent radius	-0.396262	-0.204163	-0.351436	-0.311373	0.888765	1	-0.337385	1	-0.310473	-0.202515	-0.176012	-0.070832	0.63782	0.753504	0.607854	0.55537	0.703539	0.767742	0.827364	-0.289738	0.827678	-0.242358	-0.295917	-0.153076	0.118806	0.698776	0.568854	0.337931	0.154633	0.30622	-0.407659	0.496217	-0.0896552	-0.0860957	0.279199	0.0300334	0.111902	-0.107453	0.076307	0.367742	0.0860957	0.132369
9	Cell compactness	-0.147	-0.259375	-0.101752	-0.140801	-0.568754	-0.310473	0.992511	-0.310473	1	0.571175	0.104295	0.460251	-0.610017	-0.309358	-0.293443	-0.417542	-0.572243	-0.548234	-0.299544	0.53897	-0.297346	0.587426	0.442897	0.088334	0.254014	-0.293076	-0.169957	-0.0167281	-0.0869956	-0.367471	-0.146317	-0.109091	0.148322	0.0733804	-0.190031	-0.200737	-0.120665	0.582136	0.528161	0.315826	-0.302666	-0.328985
10	Cell elongation	-0.134876	-0.381292	-0.0785929	-0.024936	-0.401691	-0.202515	0.594469	-0.202515	0.571175	1	-0.13044	0.277964	-0.752643	-0.0360521	-0.225796	-0.313405	-0.436714	-0.390342	-0.210304	0.484361	-0.209659	0.498495	0.621634	0.0671044	0.267966	-0.381217	0.0950262	0.142873	0.0494102	-0.170971	-0.124165	-0.0703395	0.471125	0.375876	0.119506	-0.506509	-0.423278	0.377879	0.268165	0.156893	-0.241905	-0.273061
11	Cell flatness	0.149327	0.302194	0.197462	0.119101	-0.212061	-0.176012	0.111632	-0.176012	0.104295	-0.13044	1	0.392336	-0.226079	-0.512906	0.350618	-0.240454	-0.211487	-0.145972	-0.0694259	0.31695	-0.0679871	0.339734	-0.118282	0.723044	0.429643	-0.154651	-0.540053	0.467067	-0.23623	-0.24463	0.142078	0.018028	-0.201602	-0.207388	-0.269693	0.165777	0.161104	0.017579	0.108812	-0.0534045	0.0961282	0.186248
12	Cell spareness	0.000891068	-0.0347749	0.0120334	-0.0338719	-0.207373	-0.070832	0.468855	-0.070832	0.460251	0.277964	0.392336	1	-0.249471	-0.0866467	0.245266	-0.480834	-0.373928	-0.18354	0.00512307	0.688887	0.00735131	0.717463	0.159278	0.283359	0.616274	-0.0510079	-0.028511	0.364183	-0.210292	-0.224599	0.0147124	0.0581486	0.301816	0.276423	0.0862012	-0.239225	-0.240116	0.337677	0.310057	0.216505	0.0302929	0.042321
13	Cell x-axis	-0.0883302	0.0630079	-0.196083	-0.166704	0.783315	0.63782	-0.632848	0.63782	-0.610017	-0.752643	-0.226079	-0.249471	1	0.666741	0.537991	0.515971	0.720677	0.705895	0.527475	-0.60941	0.527311	-0.593844	-0.497274	-0.246301	-0.272264	0.605339	0.350834	0.00155729	0.104795	0.435741	-0.105978	0.219181	-0.213348	-0.135484	0.284538	0.229811	0.16129	-0.389989	-0.2396	-0.0104561	0.228476	0.257842
14	Cell y-axis	-0.303927	-0.249137	-0.415535	-0.318495	0.774416	0.753504	-0.326459	0.753504	-0.309358	-0.0360521	-0.512906	-0.0866467	0.666741	1	0.569363	0.511074	0.636101	0.631146	0.554616	-0.391381	0.5549	-0.363983	0.00333741	-0.365113	-0.113856	0.436263	0.657397	0.123026	0.219157	0.426394	-0.316153	0.307521	0.142603	0.185317	0.524805	-0.119911	-0.147052	-0.243604	-0.0878754	0.123026	0.111012	0.106563
15	Cell z-axis	-0.130841	0.0920731	-0.269115	-0.2266	0.618756	0.607854	-0.297057	0.607854	-0.293443	-0.225796	0.350618	0.245266	0.537991	0.569363	1	0.355632	0.467001	0.531984	0.525086	-0.0976326	0.526702	-0.0584759	-0.135291	0.272808	0.23145	0.308822	0.187563	0.564245	-0.0139074	0.188961	-0.15275	0.363859	0.00600734	0.0551786	0.368005	0.0166871	-0.0211369	-0.344866	-0.0994549	-0.0126822	0.30059	0.357993
16	Cell solidity	-0.224288	0.0416574	-0.30108	-0.287496	0.689371	0.55537	-0.424476	0.55537	-0.417542	-0.313405	-0.240454	-0.480834	0.515971	0.511074	0.355632	1	0.825075	0.547802	0.396661	-0.567505	0.392809	-0.566151	0.0112422	-0.289849	-0.292453	0.224151	0.397997	0.0678909	0.373776	0.284569	-0.255848	0.304464	-0.23172	-0.159377	0.151141	0.33478	0.229048	-0.397774	-0.315192	-0.14246	0.214802	0.25576
17	Cell convexity	-0.153589	0.0100234	-0.227566	-0.203295	0.86312	0.703539	-0.595316	0.703539	-0.572243	-0.436714	-0.211487	-0.373928	0.720677	0.636101	0.467001	0.825075	1	0.779435	0.602715	-0.64868	0.601336	-0.62436	-0.224485	-0.277796	-0.262818	0.506121	0.450033	0.127977	0.32276	0.512746	-0.181201	0.32569	-0.0910305	-0.0307144	0.296906	0.129535	0.0500779	-0.262408	-0.152237	0.0721122	0.0921433	0.135099
18	Nucleus surface area	0.169763	0.134699	0.0994881	0.173826	0.844716	0.767742	-0.584459	0.767742	-0.548234	-0.390342	-0.145972	-0.18354	0.705895	0.631146	0.531984	0.547802	0.779435	1	0.908788	-0.562051	0.907554	-0.5231	-0.421626	-0.165758	-0.144007	0.78376	0.601335	0.38198	0.462788	0.634695	0.145163	0.131064	-0.0464961	0.018465	0.216018	0.076307	0.0464961	-0.30723	-0.0812013	0.176418	0.281869	0.260512
19	Nucleus volume	0.102347	0.0890571	0.0371689	0.12219	0.762403	0.827364	-0.341845	0.827364	-0.299544	-0.210304	-0.0694259	0.00512307	0.527475	0.554616	0.525086	0.396661	0.602715	0.908788	1	-0.24506	0.999889	-0.194824	-0.39159	-0.0843253	0.109581	0.8198	0.582647	0.476752	0.345533	0.460443	0.0868307	0.193369	-0.054505	-0.0246941	0.134149	0.0358176	0.110567	-0.175528	0.108343	0.349499	0.212458	0.168409
20	Nucleus sphericity	-0.080653	-0.0523142	-0.092078	-0.0994531	-0.494587	-0.289738	0.558219	-0.289738	0.53897	0.484361	0.31695	0.688887	-0.60941	-0.391381	-0.0976326	-0.567505	-0.64868	-0.562051	-0.24506	1	-0.243076	0.990477	0.260279	0.333559	0.65422	-0.308279	-0.274771	0.175362	-0.373886	-0.528719	-0.0415831	-0.0149705	0.218029	0.148108	-0.0994089	-0.234113	-0.144981	0.33732	0.279462	0.103877	-0.0547307	-0.0779634
21	Nucleus equivalent radius	0.101914	0.0881764	0.0360601	0.121313	0.76182	0.827678	-0.339653	0.827678	-0.297346	-0.209659	-0.0679871	0.00735131	0.527311	0.5549	0.526702	0.392809	0.601336	0.907554	0.999889	-0.243076	1	-0.192502	-0.393302	-0.0836671	0.111956	0.820113	0.5816	0.47725	0.342457	0.458825	0.086061	0.193836	-0.0538436	-0.0240294	0.135054	0.0349316	0.109912	-0.174435	0.10969	0.350428	0.210924	0.167538
22	Nucleus compactness	-0.0916197	-0.0834173	-0.106944	-0.114981	-0.460614	-0.242358	0.602617	-0.242358	0.587426	0.498495	0.339734	0.717463	-0.593844	-0.363983	-0.0584759	-0.566151	-0.62436	-0.5231	-0.194824	0.990477	-0.192502	1	0.25533	0.362126	0.673536	-0.267129	-0.263335	0.228968	-0.33367	-0.486887	-0.0560582	-0.0224331	0.255971	0.179648	-0.0816786	-0.281412	-0.187682	0.37715	0.33274	0.158001	-0.071413	-0.0845797
23	Nucleus elongation	-0.242546	-0.12937	-0.276016	-0.234168	-0.357326	-0.295917	0.471009	-0.295917	0.442897	0.621634	-0.118282	0.159278	-0.497274	0.00333741	-0.135291	0.0112422	-0.224485	-0.421626	-0.39159	0.260279	-0.393302	0.25533	1	-0.335336	-0.0718992	-0.712426	0.20336	-0.20158	-0.101024	-0.346205	-0.227455	-0.0244798	0.359328	0.37468	0.179775	-0.217377	-0.298365	0.160196	0.0898876	-0.101235	-0.131272	-0.145511
24	Nucleus flatness	0.202715	0.148074	0.159154	0.127991	-0.160863	-0.153076	0.0878682	-0.153076	0.088334	0.0671044	0.723044	0.283359	-0.246301	-0.365113	0.272808	-0.289849	-0.277796	-0.165758	-0.0843253	0.333559	-0.0836671	0.362126	-0.335336	1	0.591959	-0.0287017	-0.668372	0.631438	-0.000667557	-0.0248164	0.184591	-0.0659842	-0.109467	-0.165091	-0.27834	-0.0313717	0.0100122	0.037379	0.0749805	-0.0609634	0.132829	0.20158
25	Nucleus spareness	-0.0564842	0.107639	-0.0839667	-0.0868932	-0.0416272	0.118806	0.234561	0.118806	0.254014	0.267966	0.429643	0.616274	-0.272264	-0.113856	0.23145	-0.292453	-0.262818	-0.144007	0.109581	0.65422	0.111956	0.673536	-0.0718992	0.591959	1	-0.0504026	-0.279015	0.47815	-0.272745	-0.35091	-0.04515	0.249931	0.0549029	0.0121506	-0.123756	-0.0519777	0.0155258	0.208586	0.361594	0.277889	-0.0209261	0.0481525
26	Nucleus x-axis	0.0832128	-0.0852722	0.12041	0.154685	0.659622	0.698776	-0.32356	0.698776	-0.293076	-0.381217	-0.154651	-0.0510079	0.605339	0.436263	0.308822	0.224151	0.506121	0.78376	0.8198	-0.308279	0.820113	-0.267129	-0.712426	-0.0287017	-0.0504026	1	0.407786	0.355284	0.366225	0.591076	0.0641211	0.140854	-0.150167	-0.168854	0.0625139	-0.0162403	0.103003	-0.00912125	0.0598443	0.353059	0.134149	0.101224
27	Nucleus y-axis	-0.0910001	-0.162307	-0.00912531	0.0896951	0.509677	0.568854	-0.164121	0.568854	-0.169957	0.0950262	-0.540053	-0.028511	0.350834	0.657397	0.187563	0.397997	0.450033	0.601335	0.582647	-0.274771	0.5816	-0.263335	0.20336	-0.668372	-0.279015	0.407786	1	0.0976641	0.380688	0.402359	-0.090393	0.157543	0.207564	0.255172	0.371746	-0.0847608	-0.114127	-0.0438265	-0.0175751	0.16129	0.221357	0.117241
28	Nucleus z-axis	0.229391	0.157631	0.239261	0.280659	0.287653	0.337931	-0.0136024	0.337931	-0.0167281	0.142873	0.467067	0.364183	0.00155729	0.123026	0.564245	0.0678909	0.127977	0.38198	0.476752	0.175362	0.47725	0.228968	-0.20158	0.631438	0.47815	0.355284	0.0976641	1	0.436756	0.374986	0.207058	0.0841122	0.0393771	0.0371524	-0.0113459	-0.0522803	-0.0500556	-0.0384872	0.0438265	0.0335929	0.397553	0.359288
29	Nucleus solidity	0.412105	0.0999778	0.362159	0.41291	0.274113	0.154633	-0.102587	0.154633	-0.0869956	0.0494102	-0.23623	-0.210292	0.104795	0.219157	-0.0139074	0.373776	0.32276	0.462788	0.345533	-0.373886	0.342457	-0.33367	-0.101024	-0.000667557	-0.272745	0.366225	0.380688	0.436756	1	0.795682	0.385438	-0.241015	0.0718656	0.123707	-0.0409389	0.0204695	-0.0685282	-0.113917	-0.10969	-0.136166	0.371565	0.213594
30	Nucleus convexity	0.384376	0.0654788	0.322164	0.40521	0.486258	0.30622	-0.379769	0.30622	-0.367471	-0.170971	-0.24463	-0.224599	0.435741	0.426394	0.188961	0.284569	0.512746	0.634695	0.460443	-0.528719	0.458825	-0.486887	-0.346205	-0.0248164	-0.35091	0.591076	0.402359	0.374986	0.795682	1	0.356013	-0.157485	0.133749	0.17848	0.211417	-0.148659	-0.177367	-0.140648	-0.0843441	-0.0522978	0.300434	0.122399
31	Ratio betweeen nuclear and cell volume	0.993988	0.680927	0.747522	0.785165	-0.258488	-0.407659	-0.179982	-0.407659	-0.146317	-0.124165	0.142078	0.0147124	-0.105978	-0.316153	-0.15275	-0.255848	-0.181201	0.145163	0.0868307	-0.0415831	0.086061	-0.0560582	-0.227455	0.184591	-0.04515	0.0641211	-0.090393	0.207058	0.385438	0.356013	1	-0.548491	0.0478682	0.134922	-0.230658	0.103306	0.00111321	-0.289213	-0.0385172	-0.201269	0.273183	0.0988534
32	Mean actin cortical thickness	-0.52843	-0.231377	-0.564782	-0.529386	0.394081	0.496217	-0.113862	0.496217	-0.109091	-0.0703395	0.018028	0.0581486	0.219181	0.307521	0.363859	0.304464	0.32569	0.131064	0.193369	-0.0149705	0.193836	-0.0224331	-0.0244798	-0.0659842	0.249931	0.140854	0.157543	0.0841122	-0.241015	-0.157485	-0.548491	1	-0.20672	-0.226079	0.0685358	0.109257	0.212061	0.187138	0.148198	0.366934	-0.283267	-0.169114
33	Actin mean intensity	0.0160196	-0.166982	-0.0398398	-0.000222568	-0.155506	-0.0896552	0.179062	-0.0896552	0.148322	0.471125	-0.201602	0.301816	-0.213348	0.142603	0.00600734	-0.23172	-0.0910305	-0.0464961	-0.054505	0.218029	-0.0538436	0.255971	0.359328	-0.109467	0.0549029	-0.150167	0.207564	0.0393771	0.0718656	0.133749	0.0478682	-0.20672	1	0.972859	0.730812	-0.828254	-0.914572	0.320578	0.252503	0.185762	-0.19644	-0.232481
34	Actin texture	0.101902	-0.0202605	-0.0140218	0.0389495	-0.106118	-0.0860957	0.0961091	-0.0860957	0.0733804	0.375876	-0.207388	0.276423	-0.135484	0.185317	0.0551786	-0.159377	-0.0307144	0.018465	-0.0246941	0.148108	-0.0240294	0.179648	0.37468	-0.165091	0.0121506	-0.168854	0.255172	0.0371524	0.123707	0.17848	0.134922	-0.226079	0.972859	1	0.735261	-0.714349	-0.85584	0.225362	0.246719	0.147497	-0.118576	-0.206229
35	Actin integrated density	-0.260541	-0.216186	-0.240151	-0.211217	0.228921	0.279199	-0.137585	0.279199	-0.190031	0.119506	-0.269693	0.0862012	0.284538	0.524805	0.368005	0.151141	0.296906	0.216018	0.134149	-0.0994089	0.135054	-0.0816786	0.179775	-0.27834	-0.123756	0.0625139	0.371746	-0.0113459	-0.0409389	0.211417	-0.230658	0.0685358	0.730812	0.735261	1	-0.521691	-0.611123	-0.00867631	-0.0140156	0.0674082	-0.1297	-0.168854
36	Actin skewness	0.110357	0.376044	0.148898	0.0883597	0.118576	0.0300334	-0.226336	0.0300334	-0.200737	-0.506509	0.165777	-0.239225	0.229811	-0.119911	0.0166871	0.33478	0.129535	0.076307	0.0358176	-0.234113	0.0349316	-0.281412	-0.217377	-0.0313717	-0.0519777	-0.0162403	-0.0847608	-0.0522803	0.0204695	-0.148659	0.103306	0.109257	-0.828254	-0.714349	-0.521691	1	0.914572	-0.433593	-0.232036	-0.251168	0.276085	0.193326
37	Actin kurtosis	0.0140171	0.278749	0.099043	0.0514133	0.120356	0.111902	-0.148289	0.111902	-0.120665	-0.423278	0.161104	-0.240116	0.16129	-0.147052	-0.0211369	0.229048	0.0500779	0.0464961	0.110567	-0.144981	0.109912	-0.187682	-0.298365	0.0100122	0.0155258	0.103003	-0.114127	-0.0500556	-0.0685282	-0.177367	0.00111321	0.212061	-0.914572	-0.85584	-0.611123	0.914572	1	-0.368632	-0.193326	-0.168409	0.192881	0.12881
38	DAPI mean intensity	-0.295695	-0.481576	-0.153795	-0.160917	-0.303226	-0.107453	0.583344	-0.107453	0.582136	0.377879	0.017579	0.337677	-0.389989	-0.243604	-0.344866	-0.397774	-0.262408	-0.30723	-0.175528	0.33732	-0.174435	0.37715	0.160196	0.037379	0.208586	-0.00912125	-0.0438265	-0.0384872	-0.113917	-0.140648	-0.289213	0.187138	0.320578	0.225362	-0.00867631	-0.433593	-0.368632	1	0.74238	0.699221	-0.552392	-0.559066
39	DAPI texture	-0.058516	-0.123789	-0.0856889	-0.0523036	-0.12881	0.076307	0.477201	0.076307	0.528161	0.268165	0.108812	0.310057	-0.2396	-0.0878754	-0.0994549	-0.315192	-0.152237	-0.0812013	0.108343	0.279462	0.10969	0.33274	0.0898876	0.0749805	0.361594	0.0598443	-0.0175751	0.0438265	-0.10969	-0.0843441	-0.0385172	0.148198	0.252503	0.246719	-0.0140156	-0.232036	-0.193326	0.74238	1	0.838932	-0.455395	-0.621357
40	DAPI integrated density	-0.214039	-0.320606	-0.252615	-0.237926	0.128365	0.367742	0.272272	0.367742	0.315826	0.156893	-0.0534045	0.216505	-0.0104561	0.123026	-0.0126822	-0.14246	0.0721122	0.176418	0.349499	0.103877	0.350428	0.158001	-0.101235	-0.0609634	0.277889	0.353059	0.16129	0.0335929	-0.136166	-0.0522978	-0.201269	0.366934	0.185762	0.147497	0.0674082	-0.251168	-0.168409	0.699221	0.838932	1	-0.605339	-0.619132
41	DAPI skewness	0.294137	0.369364	0.406187	0.449366	0.266296	0.0860957	-0.288773	0.0860957	-0.302666	-0.241905	0.0961282	0.0302929	0.228476	0.111012	0.30059	0.214802	0.0921433	0.281869	0.212458	-0.0547307	0.210924	-0.071413	-0.131272	0.132829	-0.0209261	0.134149	0.221357	0.397553	0.371565	0.300434	0.273183	-0.283267	-0.19644	-0.118576	-0.1297	0.276085	0.192881	-0.552392	-0.455395	-0.605339	1	0.849166
42	DAPI kurtosis	0.131049	0.24513	0.221456	0.204986	0.283648	0.132369	-0.311518	0.132369	-0.328985	-0.273061	0.186248	0.042321	0.257842	0.106563	0.357993	0.25576	0.135099	0.260512	0.168409	-0.0779634	0.167538	-0.0845797	-0.145511	0.20158	0.0481525	0.101224	0.117241	0.359288	0.213594	0.122399	0.0988534	-0.169114	-0.232481	-0.206229	-0.168854	0.193326	0.12881	-0.559066	-0.621357	-0.619132	0.849166	1
Supplementary Table 6: Dataset of p-values associated with the Spearman rank correlation
#		1	2	3	4	5	6	7	8	9	10	11	12	13	14	15	16	17	18	19	20	21	22	23	24	25	26	27	28	29	30	31	32	33	34	35	36	37	38	39	40	41	42
1	Mean apparent elastic modulus, E	1	3.61218e-05	3.47505e-06	2.82831e-07	0.222699	0.0301724	0.33672	0.0301724	0.438241	0.557627	0.220949	0.220949	0.642536	0.102504	0.490718	0.233446	0.417755	0.369796	0.590455	0.671803	0.592039	0.630152	0.0927183	0.10478	0.43511	0.661989	0.632477	0.222699	0.0236416	0.0359771	1.90156e-28	0.002684	0.933041	0.59208	0.16436	0.561547	0.941395	0.112631	0.758729	0.256061	0.114628	0.490023
2	Standard error of E ***	3.61218e-05	1	0.0120252	0.0106307	0.745243	0.279171	0.111782	0.279171	0.166324	0.32902	0.145148	0.145148	0.740816	0.184295	0.628452	0.826988	0.958076	0.477908	0.639791	0.783663	0.643118	0.661208	0.162435	0.185158	0.404396	0.654134	0.39149	0.405457	0.59913	0.731017	3.45203e-05	0.218609	0.377803	0.915371	0.251209	0.0405582	0.135793	0.0070502	0.514578	0.0841059	0.0445584	0.191687
3	Mean apparent viscosity, m ***	3.47505e-06	0.0120252	1	1.5269e-15	0.15687	0.0568645	0.586205	0.0568645	0.59263	0.857176	0.397894	0.397894	0.299047	0.0223927	0.150417	0.105926	0.226503	0.600929	0.845394	0.628434	0.849953	0.573787	0.11069	0.268591	0.471697	0.526212	0.961829	0.202878	0.0492199	0.0825253	2.06587e-06	0.00114794	0.834431	0.941376	0.201152	0.432285	0.602567	0.417125	0.652549	0.178044	0.02593	0.239557
4	Standard error of m ***	2.82831e-07	0.0106307	1.5269e-15	1	0.286899	0.0939489	0.443831	0.0939489	0.458002	0.766477	0.423613	0.423613	0.37861	0.0862829	0.228535	0.123439	0.281265	0.358279	0.520067	0.601058	0.523089	0.545158	0.153857	0.327087	0.457823	0.414401	0.637386	0.133021	0.0233433	0.0263249	2.77889e-07	0.00262786	0.999069	0.838082	0.262532	0.642425	0.787303	0.395612	0.783705	0.205487	0.0127318	0.277198
5	Cell surface area	0.222699	0.745243	0.15687	0.286899	1	5.44226e-11	0.000445049	5.44226e-11	0.00103999	0.00605263	0.633085	0.633085	3.09485e-07	5.12147e-07	0.000267543	2.5163e-05	8.42739e-10	4.37428e-09	9.76453e-07	0.00546394	1.00654e-06	0.0104221	0.0376619	0.361467	0.655624	7.33815e-05	0.00401501	0.123225	0.142695	0.00643955	0.16783	0.0311764	0.411897	0.576766	0.223676	0.532575	0.526397	0.103339	0.497533	0.499032	0.154904	0.128766
6	Cell volume *	0.0301724	0.279171	0.0568645	0.0939489	5.44226e-11	1	0.068259	0	0.0949538	0.0339527	0.805288	0.805288	0.000149738	1.53815e-06	0.000366733	0.00144355	1.44518e-05	7.36435e-07	1.72083e-08	0.12041	1.68091e-08	0.196918	0.0952307	0.336857	0.938043	1.74743e-05	0.00103738	0.0677856	0.414558	0.0998096	0.0253447	0.00528854	0.637536	0.651003	0.135136	0.874815	0.556047	0.571955	0.688585	0.0455761	0.651003	0.485623
7	Cell sphericity	0.33672	0.111782	0.586205	0.443831	0.000445049	0.068259	1	0.068259	4.0866e-27	0.0182786	0.541027	0.541027	0.000174855	0.0782873	0.110906	0.0193901	0.000519784	0.000695114	0.0644651	0.00134779	0.0663088	0.000424991	0.00179422	0.698197	0.405008	0.0811291	0.386144	0.943126	0.58958	0.0384555	0.34124	0.549104	0.343756	0.613408	0.468437	0.229093	0.434192	0.000715764	0.00766471	0.145506	0.121706	0.0937878
8	Cell equivalent radius *	0.0301724	0.279171	0.0568645	0.0939489	5.44226e-11	0	0.068259	1	0.0949538	0.0339527	0.805288	0.805288	0.000149738	1.53815e-06	0.000366733	0.00144355	1.44518e-05	7.36435e-07	1.72083e-08	0.12041	1.68091e-08	0.196918	0.0952307	0.336857	0.938043	1.74743e-05	0.00103738	0.0677856	0.414558	0.0998096	0.0253447	0.00528854	0.637536	0.651003	0.135136	0.874815	0.556047	0.571955	0.688585	0.0455761	0.651003	0.485623
9	Cell compactness	0.438241	0.166324	0.59263	0.458002	0.00103999	0.0949538	4.0866e-27	0.0949538	1	0.0469049	0.477871	0.477871	0.000344811	0.0962095	0.115526	0.0216877	0.000952607	0.00170986	0.107807	0.00211854	0.110542	0.000642691	0.00404068	0.700308	0.424156	0.116004	0.369241	0.930086	0.647588	0.045748	0.440396	0.566073	0.434088	0.699968	0.314503	0.287494	0.525328	0.00073874	0.00270001	0.0890984	0.104009	0.0758736
10	Cell elongation	0.557627	0.32902	0.857176	0.766477	0.00605263	0.0339527	0.0182786	0.0339527	0.0469049	1	0.125621	0.125621	0.00467215	0.761221	0.558816	0.70551	0.0433364	0.0114084	0.00936304	0.31445	0.00943102	0.374303	1.91833e-05	0.599825	0.755006	0.00025861	0.92649	0.791714	0.671094	0.0728676	0.596391	0.26895	0.0840694	0.110649	0.113759	0.506936	0.16854	0.963674	0.513769	0.248166	0.67627	0.71527
11	Cell flatness	0.220949	0.145148	0.397894	0.423613	0.633085	0.805288	0.541027	0.805288	0.477871	0.125621	1	0	0.166695	0.0461016	0.0645997	0.0528007	0.289249	0.862763	0.466234	0.00307282	0.463289	0.00116903	0.44037	7.06751e-09	3.28473e-05	0.980437	0.0487183	0.000986534	0.466184	0.611369	0.218574	0.785387	0.911665	0.986958	0.200567	0.562874	0.823441	0.442637	0.125051	0.513816	0.680599	0.520693
12	Cell spareness	0.220949	0.145148	0.397894	0.423613	0.633085	0.805288	0.541027	0.805288	0.477871	0.125621	0	1	0.166695	0.0461016	0.0645997	0.0528007	0.289249	0.862763	0.466234	0.00307282	0.463289	0.00116903	0.44037	7.06751e-09	3.28473e-05	0.980437	0.0487183	0.000986534	0.466184	0.611369	0.218574	0.785387	0.911665	0.986958	0.200567	0.562874	0.823441	0.442637	0.125051	0.513816	0.680599	0.520693
13	Cell x-axis	0.642536	0.740816	0.299047	0.37861	3.09485e-07	0.000149738	0.000174855	0.000149738	0.000344811	0.00467215	0.166695	0.166695	1	5.74158e-05	0.00216633	0.00351624	7.07108e-06	1.31377e-05	0.00274113	0.000350841	0.00275103	0.000541013	0.00180579	0.217561	0.253101	0.000393765	0.0573193	0.993484	0.581554	0.0160882	0.577272	0.244541	0.257636	0.475323	0.127519	0.221831	0.394502	0.0331329	0.202221	0.956267	0.224602	0.168933
14	Cell y-axis	0.102504	0.184295	0.0223927	0.0862829	5.12147e-07	1.53815e-06	0.0782873	1.53815e-06	0.0962095	0.761221	0.0461016	0.0461016	5.74158e-05	1	0.00102426	0.00389938	0.000158035	0.000184277	0.00146986	0.0324567	0.00145989	0.048005	0.894135	0.0106665	0.226702	0.0159473	7.91258e-05	0.517196	0.244595	0.0187916	0.0887497	0.0983046	0.452211	0.326879	0.00290644	0.527939	0.438077	0.194554	0.644256	0.517196	0.559212	0.57516
15	Cell z-axis	0.490718	0.628452	0.150417	0.228535	0.000267543	0.000366733	0.110906	0.000366733	0.115526	0.558816	0.0645997	0.0645997	0.00216633	0.00102426	1	0.0537688	0.00927522	0.00248033	0.00288865	0.607768	0.00278812	0.75889	0.350517	0.0666047	0.187113	0.0968171	0.320946	0.00116325	0.941853	0.317287	0.420334	0.0480869	0.974866	0.772119	0.0454097	0.930257	0.911724	0.0619902	0.601051	0.946969	0.106524	0.0520866
16	Cell solidity	0.233446	0.826988	0.105926	0.123439	2.5163e-05	0.00144355	0.0193901	0.00144355	0.0216877	0.70551	0.0528007	0.0528007	0.00351624	0.00389938	0.0537688	1	2.03837e-08	0.00172728	0.0299916	0.00107294	0.031774	0.00110967	0.841209	0.157221	0.145622	0.233738	0.0293929	0.721492	0.041883	0.127476	0.17237	0.101869	0.21791	0.40021	0.425305	0.070554	0.223411	0.029492	0.0897769	0.45267	0.254329	0.172522
17	Cell convexity	0.417755	0.958076	0.226503	0.281265	8.42739e-10	1.44518e-05	0.000519784	1.44518e-05	0.000952607	0.0433364	0.289249	0.289249	7.07108e-06	0.000158035	0.00927522	2.03837e-08	1	3.86587e-07	0.000423829	0.000105695	0.000440437	0.000226466	0.153323	0.206205	0.155219	0.00432283	0.0125837	0.500341	0.0819268	0.00376471	0.337927	0.0790332	0.632363	0.871999	0.111095	0.495095	0.792706	0.161248	0.421916	0.704922	0.628189	0.476589
18	Nucleus surface area	0.369796	0.477908	0.600929	0.358279	4.37428e-09	7.36435e-07	0.000695114	7.36435e-07	0.00170986	0.0114084	0.862763	0.862763	1.31377e-05	0.000184277	0.00248033	0.00172728	3.86587e-07	1	3.84046e-12	0.00122771	4.5993e-12	0.00301648	0.00502856	0.631565	0.747601	3.01604e-07	0.000440446	0.0372494	0.010019	0.000165121	0.444049	0.489975	0.807246	0.922848	0.251587	0.688585	0.807246	0.0986396	0.669696	0.351044	0.131287	0.164409
19	Nucleus volume	0.590455	0.639791	0.845394	0.520067	9.76453e-07	1.72083e-08	0.0644651	1.72083e-08	0.107807	0.00936304	0.466234	0.466234	0.00274113	0.00146986	0.00288865	0.0299916	0.000423829	3.84046e-12	1	0.191818	1.08721e-52	0.302223	0.00783792	0.959973	0.516326	2.98447e-08	0.000728942	0.0077302	0.0614535	0.0104544	0.648213	0.305918	0.774829	0.89694	0.479723	0.850951	0.560798	0.353518	0.568757	0.0583392	0.259674	0.373681
20	Nucleus sphericity	0.671803	0.783663	0.628434	0.601058	0.00546394	0.12041	0.00134779	0.12041	0.00211854	0.31445	0.00307282	0.00307282	0.000350841	0.0324567	0.607768	0.00107294	0.000105695	0.00122771	0.191818	1	0.195553	1.16624e-25	0.13124	0.0458786	0.000128104	0.0974357	0.141701	0.353982	0.0418177	0.00266691	0.827292	0.937417	0.247091	0.434759	0.60122	0.213059	0.444628	0.0683158	0.134753	0.584886	0.773921	0.682171
21	Nucleus equivalent radius	0.592039	0.643118	0.849953	0.523089	1.00654e-06	1.68091e-08	0.0663088	1.68091e-08	0.110542	0.00943102	0.463289	0.463289	0.00275103	0.00145989	0.00278812	0.031774	0.000440437	4.5993e-12	1.08721e-52	0.195553	1	0.308134	0.0076344	0.955318	0.508607	2.91857e-08	0.000749154	0.00765752	0.063958	0.0107639	0.651134	0.30473	0.777493	0.8997	0.476738	0.854599	0.563136	0.35657	0.563932	0.057628	0.26321	0.376194
22	Nucleus compactness	0.630152	0.661208	0.573787	0.545158	0.0104221	0.196918	0.000424991	0.196918	0.000642691	0.374303	0.00116903	0.00116903	0.000541013	0.048005	0.75889	0.00110967	0.000226466	0.00301648	0.302223	1.16624e-25	0.308134	1	0.124303	0.0322082	9.02682e-05	0.153568	0.159719	0.223578	0.0715504	0.00636108	0.768584	0.906333	0.172156	0.342152	0.667864	0.13194	0.320632	0.0399245	0.0723929	0.404342	0.707657	0.656771
23	Nucleus elongation	0.0927183	0.162435	0.11069	0.153857	0.0376619	0.0952307	0.00179422	0.0952307	0.00404068	1.91833e-05	0.44037	0.44037	0.00180579	0.894135	0.350517	0.841209	0.153323	0.00502856	0.00783792	0.13124	0.0076344	0.124303	1	0.160232	0.573864	2.20836e-05	0.48844	0.558288	0.94184	0.163	0.106564	0.920023	0.0164533	0.0195585	0.21847	0.0856262	0.031889	0.150162	0.573428	0.665325	0.358959	0.320253
24	Nucleus flatness	0.10478	0.185158	0.268591	0.327087	0.361467	0.336857	0.698197	0.336857	0.700308	0.599825	7.06751e-09	7.06751e-09	0.217561	0.0106665	0.0666047	0.157221	0.206205	0.631565	0.959973	0.0458786	0.955318	0.0322082	0.160232	1	0.000256407	0.861905	0.000949247	0.000600643	0.688021	0.614004	0.134037	0.699241	0.2875	0.202498	0.0504846	0.715422	0.583892	0.898754	0.85365	0.611647	0.347189	0.178886
25	Nucleus spareness	0.43511	0.404396	0.471697	0.457823	0.655624	0.938043	0.405008	0.938043	0.424156	0.755006	3.28473e-05	3.28473e-05	0.253101	0.226702	0.187113	0.145622	0.155219	0.747601	0.516326	0.000128104	0.508607	9.02682e-05	0.573864	0.000256407	1	0.970877	0.414305	0.00514274	0.565882	0.249157	0.433391	0.980735	0.48449	0.630161	0.607592	0.639451	0.669364	0.567535	0.591918	0.892253	0.148115	0.0966331
26	Nucleus x-axis	0.661989	0.654134	0.526212	0.414401	7.33815e-05	1.74743e-05	0.0811291	1.74743e-05	0.116004	0.00025861	0.980437	0.980437	0.000393765	0.0159473	0.0968171	0.233738	0.00432283	3.01604e-07	2.98447e-08	0.0974357	2.91857e-08	0.153568	2.20836e-05	0.861905	0.970877	1	0.0252945	0.0540208	0.046544	0.00058298	0.736396	0.457831	0.428328	0.372402	0.74278	0.93212	0.588064	0.961846	0.753419	0.0556508	0.479723	0.594562
27	Nucleus y-axis	0.632477	0.39149	0.961829	0.637386	0.00401501	0.00103738	0.386144	0.00103738	0.369241	0.92649	0.0487183	0.0487183	0.0573193	7.91258e-05	0.320946	0.0293929	0.0125837	0.000440446	0.000728942	0.141701	0.000749154	0.159719	0.48844	0.000949247	0.414305	0.0252945	1	0.607652	0.0379506	0.0275046	0.634759	0.405722	0.271067	0.173544	0.0430973	0.656081	0.54817	0.818125	0.926556	0.394502	0.239772	0.537231
28	Nucleus z-axis	0.222699	0.405457	0.202878	0.133021	0.123225	0.0677856	0.943126	0.0677856	0.930086	0.791714	0.000986534	0.000986534	0.993484	0.517196	0.00116325	0.721492	0.500341	0.0372494	0.0077302	0.353982	0.00765752	0.223578	0.558288	0.000600643	0.00514274	0.0540208	0.607652	1	0.015815	0.0411717	0.272264	0.658554	0.836328	0.845462	0.95255	0.783799	0.792797	0.839979	0.818125	0.860116	0.0295908	0.0511818
29	Nucleus solidity *	0.0236416	0.59913	0.0492199	0.0233433	0.142695	0.414558	0.58958	0.414558	0.647588	0.671094	0.466184	0.466184	0.581554	0.244595	0.941853	0.041883	0.0819268	0.010019	0.0614535	0.0418177	0.063958	0.0715504	0.94184	0.688021	0.565882	0.046544	0.0379506	0.015815	1	1.47639e-07	0.0354244	0.199488	0.705886	0.514861	0.829928	0.914501	0.718983	0.548911	0.563932	0.473081	0.0432071	0.257074
30	Nucleus convexity *	0.0359771	0.731017	0.0825253	0.0263249	0.00643955	0.0998096	0.0384555	0.0998096	0.045748	0.0728676	0.611369	0.611369	0.0160882	0.0187916	0.317287	0.127476	0.00376471	0.000165121	0.0104544	0.00266691	0.0107639	0.00636108	0.163	0.614004	0.249157	0.00058298	0.0275046	0.0411717	1.47639e-07	1	0.0534944	0.405899	0.481047	0.345352	0.262072	0.433033	0.348417	0.458498	0.65767	0.783729	0.106714	0.519348
31	Ratio betweeen nuclear and cell volume ***	1.90156e-28	3.45203e-05	2.06587e-06	2.77889e-07	0.16783	0.0253447	0.34124	0.0253447	0.440396	0.596391	0.218574	0.218574	0.577272	0.0887497	0.420334	0.17237	0.337927	0.444049	0.648213	0.827292	0.651134	0.768584	0.106564	0.134037	0.433391	0.736396	0.634759	0.272264	0.0354244	0.0534944	1	0.00169958	0.801669	0.477174	0.220085	0.586961	0.995342	0.121114	0.839856	0.286191	0.14411	0.603265
32	Mean actin cortical thickness	0.002684	0.218609	0.00114794	0.00262786	0.0311764	0.00528854	0.549104	0.00528854	0.566073	0.26895	0.785387	0.785387	0.244541	0.0983046	0.0480869	0.101869	0.0790332	0.489975	0.305918	0.937417	0.30473	0.906333	0.920023	0.699241	0.980735	0.457831	0.405722	0.658554	0.199488	0.405899	0.00169958	1	0.273064	0.229635	0.718953	0.56548	0.260588	0.322062	0.434478	0.0460899	0.129304	0.371655
33	Actin mean intensity	0.933041	0.377803	0.834431	0.999069	0.411897	0.637536	0.343756	0.637536	0.434088	0.0840694	0.911665	0.911665	0.257636	0.452211	0.974866	0.21791	0.632363	0.807246	0.774829	0.247091	0.777493	0.172156	0.0164533	0.2875	0.48449	0.428328	0.271067	0.836328	0.705886	0.481047	0.801669	0.273064	1	2.44222e-19	4.51946e-06	1.61009e-08	1.59185e-12	0.0841337	0.178244	0.325698	0.298149	0.21636
34	Actin texture	0.59208	0.915371	0.941376	0.838082	0.576766	0.651003	0.613408	0.651003	0.699968	0.110649	0.986958	0.986958	0.475323	0.326879	0.772119	0.40021	0.871999	0.922848	0.89694	0.434759	0.8997	0.342152	0.0195585	0.202498	0.630161	0.372402	0.173544	0.845462	0.514861	0.345352	0.477174	0.229635	2.44222e-19	1	3.68988e-06	9.26135e-06	1.66091e-09	0.231157	0.188732	0.436677	0.532575	0.27423
35	Actin integrated density	0.16436	0.251209	0.201152	0.262532	0.223676	0.135136	0.468437	0.135136	0.314503	0.113759	0.200567	0.200567	0.127519	0.00290644	0.0454097	0.425305	0.111095	0.251587	0.479723	0.60122	0.476738	0.667864	0.21847	0.0504846	0.607592	0.74278	0.0430973	0.95255	0.829928	0.262072	0.220085	0.718953	4.51946e-06	3.68988e-06	1	0.00311011	0.000334044	0.963706	0.941402	0.723395	0.494542	0.372402
36	Actin skewness	0.561547	0.0405582	0.432285	0.642425	0.532575	0.874815	0.229093	0.874815	0.287494	0.506936	0.562874	0.562874	0.221831	0.527939	0.930257	0.070554	0.495095	0.688585	0.850951	0.213059	0.854599	0.13194	0.0856262	0.715422	0.639451	0.93212	0.656081	0.783799	0.914501	0.433033	0.586961	0.56548	1.61009e-08	9.26135e-06	0.00311011	1	1.59185e-12	0.0166789	0.217265	0.180627	0.139729	0.306027
37	Actin kurtosis	0.941395	0.135793	0.602567	0.787303	0.526397	0.556047	0.434192	0.556047	0.525328	0.16854	0.823441	0.823441	0.394502	0.438077	0.911724	0.223411	0.792706	0.807246	0.560798	0.444628	0.563136	0.320632	0.031889	0.583892	0.669364	0.588064	0.54817	0.792797	0.718983	0.348417	0.995342	0.260588	1.59185e-12	1.66091e-09	0.000334044	1.59185e-12	1	0.0450157	0.306027	0.373681	0.307163	0.497533
38	DAPI mean intensity	0.112631	0.0070502	0.417125	0.395612	0.103339	0.571955	0.000715764	0.571955	0.00073874	0.963674	0.442637	0.442637	0.0331329	0.194554	0.0619902	0.029492	0.161248	0.0986396	0.353518	0.0683158	0.35657	0.0399245	0.150162	0.898754	0.567535	0.961846	0.818125	0.839979	0.548911	0.458498	0.121114	0.322062	0.0841337	0.231157	0.963706	0.0166789	0.0450157	1	2.64508e-06	1.71696e-05	0.00154996	0.0013204
39	DAPI texture	0.758729	0.514578	0.652549	0.783705	0.497533	0.688585	0.00766471	0.688585	0.00270001	0.513769	0.125051	0.125051	0.202221	0.644256	0.601051	0.0897769	0.421916	0.669696	0.568757	0.134753	0.563932	0.0723929	0.573428	0.85365	0.591918	0.753419	0.926556	0.818125	0.563932	0.65767	0.839856	0.434478	0.178244	0.188732	0.941402	0.217265	0.306027	2.64508e-06	1	7.02904e-09	0.0114457	0.000247725
40	DAPI integrated density	0.256061	0.0841059	0.178044	0.205487	0.499032	0.0455761	0.145506	0.0455761	0.0890984	0.248166	0.513816	0.513816	0.956267	0.517196	0.946969	0.45267	0.704922	0.351044	0.0583392	0.584886	0.057628	0.404342	0.665325	0.611647	0.892253	0.0556508	0.394502	0.860116	0.473081	0.783729	0.286191	0.0460899	0.325698	0.436677	0.723395	0.180627	0.373681	1.71696e-05	7.02904e-09	1	0.000393765	0.000264593
41	DAPI skewness	0.114628	0.0445584	0.02593	0.0127318	0.154904	0.651003	0.121706	0.651003	0.104009	0.67627	0.680599	0.680599	0.224602	0.559212	0.106524	0.254329	0.628189	0.131287	0.259674	0.773921	0.26321	0.707657	0.358959	0.347189	0.148115	0.479723	0.239772	0.0295908	0.0432071	0.106714	0.14411	0.129304	0.298149	0.532575	0.494542	0.139729	0.307163	0.00154996	0.0114457	0.000393765	1	2.99718e-09
42	DAPI kurtosis	0.490023	0.191687	0.239557	0.277198	0.128766	0.485623	0.0937878	0.485623	0.0758736	0.71527	0.520693	0.520693	0.168933	0.57516	0.0520866	0.172522	0.476589	0.164409	0.373681	0.682171	0.376194	0.656771	0.320253	0.178886	0.0966331	0.594562	0.537231	0.0511818	0.257074	0.519348	0.603265	0.371655	0.21636	0.27423	0.372402	0.306027	0.497533	0.0013204	0.000247725	0.000264593	2.99718e-09	1

## Sheet: Table S7. FEM Dataset
Supplementary Table 7: Parameters of the 8 geometries used in the numerical simulations
Category	Parameter	Definition	Geometry #	1	2	3	4	5	6
Elastic properties	En/E0	Ratio between the Young's modulus of the nucleus and the reference Young's modulus		20	20	20	20	20	20
	E0	Reference Young's modulus (i.e. relationship in the linear elasticity regime between stress and strain in a material under uniaxial deformation), equal to a typical value of T cell bulk stiffness [Pa]		800	800	800	800	800	800
	n	Poisson's ratio, i.e. transverse strain to axial strain. For a perfectly incompressible material n =0.5.		0.5	0.5	0.5	0.5	0.5	0.5
Cell geometry	2Rp (um)	Internal diameter of the glass micropipette [mm]		5	5	5	5	5	5
	2Rc (um)	Cell's diameter [mm]		8.73	8.73	8.73	8.73	8.73	8.73
	2Rn(um)	Nucleus's diameter [mm]		6.111	7.32	8.0316	8.2935	8.5554	8.68635
	Rn/Rc	Ratio between nuclear and cell radii		0.7	0.838488	0.92	0.95	0.98	0.995
Numerical simulation	C1n	Nucleus material constant for incompressible Neohokean material (C1n=Gn/2, where Gn is the nuclear shear modulus, given by Gn=En/2(1+n)) for isotropic materials) [Pa]		2666.6	2666.6	2666.6	2666.6	2666.6	2666.6
	C1c	Cytosol and cortex (excluding nucleus) material constant for incompressible Neohokean material (C1c=Gc/2, where Gc is the cytosol and cortex shear modulus, given by Gc=Ec/2(1+n)) for isotropic materials) [Pa]		133.333	133.333	133.333	133.333	133.333	133.333
	pen_n	Penalty parameter to account for incompressibility of the nucleus in the FEM simulation [Pa]		1e-07	1e-07	1e-07	1e-07	1e-07	1e-07
	pen_c	Penalty parameter to account for incompressibility of the cytsol region (excluding nucleus and cortex) in the FEM simulation [Pa]		1e-07	1e-07	1e-07	1e-07	1e-07	1e-07
	NormContStiff	Numerical parameter to account for the normal contact stiffness between the cell and the tip of the micropipette		4e-05	4e-05	5e-06	8e-05	5e-06	5e-06
	TimeSteps	Number of time steps in the simulation		800	800	400	800	800	800
	Dt	Time step size in the simulation [s]		0.05	0.05	0.05	0.05	0.05	0.05
	t_final	Final time of the simulation [s]		20	40	20	40	40	40
	DP_final	Maximum aspiration pressure applied [Pa]		-100	-220	-320	-400	-400	-800
	Number of nodes	Number of nodes used in the numerical simulation of the geometry		40950	35987	9066	40838	43778	133321
	Number of elements	Number of quadrilateral elemetns used in the numerical simulation of the geometry		40871	35941	9064	40564	43508	132808
